# Supplementary material for: Evaluation of Economic and Health Outcomes Associated With Food Taxes and Subsidies: A Systematic Review and Meta-analysis
Source: PubMed Central journal article supplement (PMC9161015; doi:10.1001/jamanetworkopen.2022.14371), 2022-06-01

## Supplemental Online Content

Andreyeva T, Marple K, Moore TE, Powell LM. Evaluation of economic and health outcomes associated with food taxes and subsidies: a systematic review and meta-analysis. *JAMA Netw Open*. 2022;5(5):e2214371.  
doi:10.1001/jamanetworkopen.2022.14371

**eAppendix 1.** Search Terms and Search Results

**eAppendix 2.** Computation of Price Elasticity of Demand

**eTable 1.** Quality Assessment of Fiscal Policy Studies

**eTable 2.** Characteristics of Studies

**eTable 3.** Sources of Heterogeneity ( $\tau^2$ ) for 3-Level Random Effects Models

**eFigure.** Publication Bias: Funnel Test (Left Panel) and Egger's Regression Test Plot (Right) for Sales: Price Elasticity of Demand for Fruit and Vegetables

This supplemental material has been provided by the authors to give readers additional information about their work.

## eAppendix 1. Search Terms and Search Results

### PubMed Search Terms

#### Concept #1: TREATMENT OR INTERVENTION

"Taxes"[MeSH] OR "Fiscal Policy"[MeSH] OR "Health Policy/economics"[MeSH] OR "Healthy Diet/economics" [MeSH] OR "Health Promotion/economics"[MeSH] OR "Consumer Behavior/economics"[MeSH] OR "Diet/economics"[MeSH] OR "Carbonated Beverages/economics"[MeSH] OR "Government Programs/economics"[MeSH] OR "Public Health/economics"[MeSH] OR tax[tiab] OR taxes[tiab] OR taxation[tiab] OR taxed[tiab] OR taxing[tiab] OR subsidy[tiab] OR subsidies[tiab] OR subsidized[tiab] OR coupon[tiab] OR coupons[tiab] OR incentive[tiab] OR incentives[tiab] OR disincentive[tiab] OR disincentives[tiab] OR discount[tiab] OR discounts[tiab] OR discounted[tiab] OR pricing[tiab] OR priced[tiab] OR "price reduction"[tiab] OR "price increase"[tiab] OR "price promotion"[tiab] OR "price promotions"[tiab] OR "price floor"[tiab] OR "price ceiling"[tiab] OR "price cap"[tiab] OR "price caps"[tiab] OR "pricing policy"[tiab] OR "pricing policies"[tiab] OR "fiscal policy"[tiab] OR "fiscal policies"[tiab] OR voucher[tiab] OR vouchers[tiab] OR rebate[tiab] OR rebates[tiab] OR levy[tiab]

AND

#### Concept #2: TARGETS FOR TREATMENT OR INTERVENTION

"Food"[MeSH] OR "Food and Beverages"[MeSH] OR "Beverages"[MeSH] OR "Sugars"[MeSH] OR "Fruit"[MeSH] OR "Vegetables"[MeSH] OR "Healthy Food"[MeSH] OR "Carbonated Beverages"[MeSH] OR "Dairy Products"[MeSH] OR "Meat"[MeSH] OR "Dietary Fats"[MeSH] OR "Fishes"[MeSH] OR "Seafood"[MeSH] OR "Infant formula"[MeSH] OR "sugary drink"[tiab] OR "sugary drinks"[tiab] OR "sugary beverages"[tiab] OR "sweetened beverage"[tiab] OR "sweetened beverages"[tiab] OR "sweetened drink"[tiab] OR "sweetened drinks"[tiab] OR "sugar-sweetened beverage"[tiab] OR "sugar-sweetened beverages"[tiab] OR "sugar-sweetened drink"[tiab] OR "sugar-sweetened drinks"[tiab] OR "carbonated beverage"[tiab] OR "carbonated beverages"[tiab] OR "carbonated-beverage"[tiab] OR "carbonated-beverages"[tiab] OR "carbonated drink"[tiab] OR "carbonated drinks"[tiab] OR "carbonated-drink"[tiab] OR "carbonated-drinks"[tiab] OR "high-calorie drink"[tiab] OR "high-calorie drinks"[tiab] OR "high calorie drink"[tiab] OR "high calorie drinks"[tiab] OR "high-calorie beverage"[tiab] OR "high-calorie beverages"[tiab] OR "high calorie beverage"[tiab] OR "high calorie beverages"[tiab] OR "low-calorie drink"[tiab] OR "low-calorie drinks"[tiab] OR "low calorie drink"[tiab] OR "low calorie drinks"[tiab] OR "low-calorie beverage"[tiab] OR "low-calorie beverages"[tiab] OR "low calorie beverage"[tiab] OR "low calorie beverages"[tiab] OR "soft drink"[tiab] OR "soft drinks"[tiab] OR "soft-drink"[tiab] OR "soft-drinks"[tiab] OR "fizzy drink"[tiab] OR "fizzy drinks"[tiab] OR "fizzy-drink"[tiab] OR "fizzy-drinks"[tiab] OR "energy

drink"[tiab] OR "energy drinks"[tiab] OR "energy-drink"[tiab] OR "energy-drinks"[tiab] OR "fruit drink"[tiab] OR "fruit drinks"[tiab] OR "fruit-drink"[tiab] OR "fruit-drinks"[tiab] OR "sports drink"[tiab] OR "sports drinks"[tiab] OR "sports-drink"[tiab] OR "sports-drinks"[tiab] OR tea[tiab] OR teas[tiab] OR coffee[tiab] OR coffees[tiab] OR soda[tiab] OR sodas[tiab] OR cola[tiab] OR colas[tiab] OR "flavored water"[tiab] OR "vitamin water"[tiab] OR SSB\*[tiab] OR "soda pop"[tiab] OR "chocolate milk"[tiab] OR "flavored milk"[tiab] OR juice[tiab] OR syrup\*[tiab] OR

"healthy food"[tiab] OR "healthy foods"[tiab] OR "unhealthy food"[tiab] OR "unhealthy foods"[tiab] OR "nutritious foods"[tiab] OR "junk food"[tiab] OR "junk foods"[tiab] OR "energy dense food"[tiab] OR "high-calorie food"[tiab] OR "highcalorie food"[tiab] OR "high calorie food"[tiab] OR "energy dense foods"[tiab] OR "high-calorie foods"[tiab] OR "highcalorie foods"[tiab] OR "high calorie foods"[tiab] OR "low-calorie food"[tiab] OR "lowcalorie food"[tiab] OR "low calorie food"[tiab] OR "low-calorie foods"[tiab] OR "lowcalorie foods"[tiab] OR "low calorie foods"[tiab] OR "highenergy food"[tiab] OR "high energy food"[tiab] OR "high-energy food"[tiab] OR "highenergy foods"[tiab] OR "high energy foods"[tiab] OR "high-energy foods"[tiab] OR "lowenergy food"[tiab] OR "low energy food"[tiab] OR "low-energy food"[tiab] OR "lowenergy foods"[tiab] OR "low energy foods"[tiab] OR "low-energy foods"[tiab] OR "low-fat"[tiab] OR "low fat"[tiab] OR "lowfat"[tiab] OR

"fatty food"[tiab] OR "fatty foods"[tiab] OR "fattening food"[tiab] OR "fattening-food"[tiab] OR "salty food"[tiab] OR "salty-food"[tiab] OR "processed food"[tiab] OR "fattening foods"[tiab] OR "fattening-foods"[tiab] OR "salty foods"[tiab] OR "salty-foods"[tiab] OR "processed foods"[tiab] OR "takeout food"[tiab] OR "take-out food"[tiab] OR "takeaway food"[tiab] OR "take-away food"[tiab] OR "takeout foods"[tiab] OR "take-out foods"[tiab] OR "takeaway foods"[tiab] OR "take-away foods"[tiab] OR "fast food"[tiab] OR "fast-food"[tiab] OR "fast foods"[tiab] OR "fast-foods"[tiab] OR fastfood[tiab] OR "healthy diet"[tiab] OR "healthy diets"[tiab] OR "unhealthy diet"[tiab] OR "unhealthy diets"[tiab] OR

fruit[tiab] OR fruits[tiab] OR vegetable[tiab] OR vegetables[tiab] OR legumes[tiab] OR pulses[tiab] OR beans[tiab] OR lentils[tiab] OR peas[tiab] OR peanut\*[tiab] OR salad[tiab] OR potato[tiab] OR potatoes[tiab] OR burger[tiab] OR candy[tiab] OR candies[tiab] OR confectionar\*[tiab] OR chips[tiab] OR snack[tiab] OR snacks[tiab] OR sweet[tiab] OR sweets[tiab] OR desert[tiab] OR "ice cream"[tiab] OR biscuit\*[tiab] OR cookie\*[tiab] OR chocolate\*[tiab] OR pizza[tiab] OR grain[tiab] OR grains[tiab] OR pasta[tiab] OR cereal[tiab] OR cereals[tiab] OR corn[tiab] OR maize[tiab] OR rice[tiab] OR wheat[tiab] OR barley[tiab] OR sorghum[tiab] OR oat[tiab] OR oats[tiab] OR oatmeal[tiab] OR rye[tiab] OR cassava[tiab] OR soybean[tiab] OR yam[tiab] OR plantain[tiab] OR millet[tiab] OR taro[tiab] OR milk[tiab] OR "low fat dairy"[tiab] OR "low-fat dairy"[tiab] OR "lowfat dairy"[tiab] OR butter[tiab] OR cheese[tiab] OR cheeses[tiab] OR margarine[tiab] OR lard[tiab] OR yogurt[tiab] OR "soybean oil"[tiab] OR "rapeseed oil"[tiab] OR "sunflower oil"[tiab] OR "olive oil"[tiab] OR "sesame oil"[tiab] OR "palm oil"[tiab] OR "coconut oil"[tiab] OR "cooking oil"[tiab] OR "vegetable oil"[tiab] OR "soya oil"[tiab] OR "peanut oil"[tiab] OR "groundnut oil"[tiab] OR fish[tiab] OR

seafood[tiab] OR pollock[tiab] OR anchovy[tiab] OR tuna[tiab] OR sardine[tiab] OR mackerel[tiab] OR herring[tiab] OR cod[tiab] OR scad[tiab] OR hairtail[tiab] OR whiting[tiab] OR squid[tiab] OR threadfin[tiab] OR menhaden[tiab] OR sprat[tiab] OR crab[tiab] OR shrimp[tiab] OR pilchard[tiab] OR

meat[tiab] OR meats[tiab] OR "lean protein"[tiab] OR beef[tiab] OR poultry[tiab] OR chicken[tiab] OR pork[tiab] OR mutton[tiab] OR goat[tiab] OR egg[tiab] OR eggs[tiab] OR fats[tiab] OR "saturated fat"[tiab] OR "unsaturated fat"[tiab] OR polyunsat\*[tiab] OR polyunsat\*[tiab] OR monounsat\*[tiab] OR mono-unsat\*[tiab] OR transfat[tiab] OR trans-fat\*[tiab] OR sodium [tiab] OR salt[tiab] OR sugar[tiab] OR sugars[tiab] OR sucrose[tiab] OR isoglucose[tiab] OR fiber[tiab] OR fibre[tiab] OR "infant formula"[tiab] OR "baby food"[tiab] OR "baby foods"[tiab] OR "infant food"[tiab] OR "infant foods"[tiab] OR "toddler formula"[tiab] OR "toddler milks"[tiab]

NOT

drug[tiab] or drugs[tiab]

Search results with the terms above on 7/3/19: n=8,261

Search results with the terms above on 1/31/20: n=258

Search results with the terms above on 6/01/20: n=205

## **Business Source Complete / CINAHL / EconLit / PSYCInfo Search Terms**

### **Concept #1: TREATMENT OR INTERVENTION**

TI(tax OR taxes OR taxation OR taxed OR taxing OR subsidy OR subsidies OR subsidized OR coupon OR coupons OR incentive OR incentives OR disincentive OR disincentives OR discount OR discounts OR discounted OR pricing OR priced OR "fiscal policy" OR "fiscal policies" OR voucher OR vouchers OR rebate OR rebates OR levy OR "price reduction" OR "price increase" OR "price promotion" OR "price promotions" OR "price floor" OR "price ceiling" OR "price cap" OR "price caps") OR

AB(tax OR taxes OR taxation OR taxed OR taxing OR subsidy OR subsidies OR subsidized OR coupon OR coupons OR incentive OR incentives OR disincentive OR disincentives OR discount OR discounts OR discounted OR pricing OR priced OR "fiscal policy" OR "fiscal policies" OR voucher OR vouchers OR rebate OR rebates OR levy OR "price reduction" OR "price increase" OR "price promotion" OR "price promotions" OR "price floor" OR "price ceiling" OR "price cap" OR "price caps")

AND

## Concept #2: TARGETS FOR TREATMENT OR INTERVENTION

TI("sugary drink" OR "sugary drinks" OR "sugary beverages" OR "sweetened beverage" OR "sweetened beverages" OR "sweetened drink" OR "sweetened drinks" OR "sugar-sweetened beverage" OR "sugar-sweetened beverages" OR "sugar-sweetened drink" OR "sugar-sweetened drinks" OR "carbonated beverage" OR "carbonated beverages" OR "carbonated-beverage" OR "carbonated-beverages" OR "carbonated drink" OR "carbonated drinks" OR "carbonated-drink" OR "carbonated-drinks" OR "high-calorie drink" OR "high-calorie drinks" OR "high calorie drink" OR "high calorie drinks" OR "high-calorie beverage" OR "high-calorie beverages" OR "high calorie beverage" OR "high calorie beverages" OR "low-calorie drink" OR "low-calorie drinks" OR "low calorie drink" OR "low calorie drinks" OR "low-calorie beverage" OR "low-calorie beverages" OR "low calorie beverage" OR "low calorie beverages" OR "soft drink" OR "soft drinks" OR "soft-drink" OR "soft-drinks" OR "fizzy drink" OR "fizzy drinks" OR "fizzy-drink" OR "fizzy-drinks" OR "energy drink" OR "energy drinks" OR "energy-drink" OR "energy-drinks" OR "fruit drink" OR "fruit drinks" OR "fruit-drink" OR "fruit-drinks" OR "sports drink" OR "sports drinks" OR "sports-drink" OR "sports-drinks" OR tea OR teas OR coffee OR coffees OR soda OR sodas OR cola OR colas OR "flavored water" OR "vitamin water" OR SSB\* OR "soda pop" OR "chocolate milk" OR "flavored milk" OR juice OR syrup\* OR "healthy food" OR "healthy foods" OR "unhealthy food" OR "unhealthy foods" OR "nutritious foods" OR "junk food" OR "junk foods" OR "energy dense food" OR "high-calorie food" OR "highcalorie food" OR "high calorie food" OR "energy dense foods" OR "high-calorie foods" OR "highcalorie foods" OR "high calorie foods" OR "low-calorie food" OR "lowcalorie food" OR "low calorie food" OR "low-calorie foods" OR "lowcalorie foods" OR "low calorie foods" OR "highenergy food" OR "high energy food" OR "high-energy food" OR "highenergy foods" OR "high energy foods" OR "high-energy foods" OR "lowenergy food" OR "low energy food" OR "low-energy food" OR "lowenergy foods" OR "low energy foods" OR "low-energy foods" OR "low-fat" OR "low fat" OR "lowfat" OR "fatty food" OR "fatty foods" OR "fattening food" OR "fattening-food" OR "salty food" OR "salty-food" OR "processed food" OR "fattening foods" OR "fattening-foods" OR "salty foods" OR "salty-foods" OR "processed foods" OR "takeout food" OR "take-out food" OR "takeaway food" OR "take-away food" OR "takeout foods" OR "take-out foods" OR "takeaway foods" OR "take-away foods" OR "fast food" OR "fast-food" OR "fast foods" OR "fast-foods" OR fastfood OR fruit OR fruits OR vegetable OR vegetables OR legumes OR pulses OR beans OR lentils OR peas OR peanut\* OR salad OR potato OR potatoes OR burger OR candy OR candies OR confectionar\* OR chips OR snack OR snacks OR sweet OR sweets OR desert OR "ice cream" OR biscuit\* OR cookie\* OR chocolate\* OR pizza OR chips OR grain OR grains OR pasta OR cereal OR cereals OR corn OR maize OR rice OR wheat OR barley OR sorghum OR oat OR oats OR oatmeal OR rye OR cassava OR soybean OR yam OR plantain OR millet OR taro OR milk OR "low fat dairy" OR "low-fat dairy" OR "lowfat dairy" OR butter OR cheese OR cheeses OR margarine OR lard OR yogurt OR "soybean oil" OR "rapeseed oil" OR "sunflower oil" OR "olive oil" OR "sesame oil" OR "palm oil" OR "coconut oil" OR "cooking oil" OR "vegetable oil" OR "soya oil" OR "peanut oil" OR "groundnut oil" OR fish OR fishes OR seafood OR pollock OR anchovy OR tuna OR sardine OR mackerel OR herring OR cod OR scad OR hairtail OR whiting OR squid OR threadfin OR menhaden OR sprat OR crab OR shrimp OR pilchard OR meat OR meats OR "lean protein" OR

beef OR poultry OR chicken OR pork OR mutton OR goat OR egg OR eggs OR fats OR “saturated fat” OR “unsaturated fat” OR polyunsat\* OR poly-unsat\* OR monounsats\* OR mono-unsat\* OR transfat OR trans-fat\* OR sodium OR salt OR sugar OR sugars OR sucrose OR isoglucose OR fiber OR fibre OR “infant formula” OR “baby food” OR “baby foods” OR “infant food” OR “infant foods” OR “toddler formula” OR “toddler milks”) OR

AB(“sugary drink” OR “sugary drinks” OR “sugary beverages” OR “sweetened beverage” OR “sweetened beverages” OR “sweetened drink” OR “sweetened drinks” OR “sugar-sweetened beverage” OR “sugar-sweetened beverages” OR “sugar-sweetened drink” OR “sugar-sweetened drinks” OR “carbonated beverage” OR “carbonated beverages” OR “carbonated-beverage” OR “carbonated-beverages” OR “carbonated drink” OR “carbonated drinks” OR “carbonated-drink” OR “carbonated-drinks” OR “high-calorie drink” OR “high-calorie drinks” OR “high calorie drink” OR “high calorie drinks” OR “high-calorie beverage” OR “high-calorie beverages” OR “high calorie beverage” OR “high calorie beverages” OR “low-calorie drink” OR “low-calorie drinks” OR “low calorie drink” OR “low calorie drinks” OR “low-calorie beverage” OR “low-calorie beverages” OR “low calorie beverage” OR “low calorie beverages” OR “soft drink” OR “soft drinks” OR “soft-drink” OR “soft-drinks” OR “fizzy drink” OR “fizzy drinks” OR “fizzy-drink” OR “fizzy-drinks” OR “energy drink” OR “energy drinks” OR “energy-drink” OR “energy-drinks” OR “fruit drink” OR “fruit drinks” OR “fruit-drink” OR “fruit-drinks” OR “sports drink” OR “sports drinks” OR “sports-drink” OR “sports-drinks” OR tea OR teas OR coffee OR coffees OR soda OR sodas OR cola OR colas OR “flavored water” OR “vitamin water” OR SSB\* OR “soda pop” OR “chocolate milk” OR “flavored milk” OR juice OR syrup\* OR “healthy food” OR “healthy foods” OR “unhealthy food” OR “unhealthy foods” OR “nutritious foods” OR “junk food” OR “junk foods” OR “energy dense food” OR “high-calorie food” OR “highcalorie food” OR “high calorie food” OR “energy dense foods” OR “high-calorie foods” OR “highcalorie foods” OR “high calorie foods” OR “low-calorie food” OR “lowcalorie food” OR “low calorie food” OR “low-calorie foods” OR “lowcalorie foods” OR “low calorie foods” OR “highenergy food” OR “high energy food” OR “high-energy food” OR “highenergy foods” OR “high energy foods” OR “high-energy foods” OR “lowenergy food” OR “low energy food” OR “low-energy food” OR “lowenergy foods” OR “low energy foods” OR “low-energy foods” OR “low-fat” OR “low fat” OR “lowfat” OR “fatty food” OR “fatty foods” OR “fattening food” OR “fattening-food” OR “salty food” OR “salty-food” OR “processed food” OR “fattening foods” OR “fattening-foods” OR “salty foods” OR “salty-foods” OR “processed foods” OR “takeout food” OR “take-out food” OR “takeaway food” OR “take-away food” OR “takeout foods” OR “take-out foods” OR “takeaway foods” OR “take-away foods” OR “fast food” OR “fast-food” OR “fast foods” OR “fast-foods” OR fastfood OR fruit OR fruits OR vegetable OR vegetables OR legumes OR pulses OR beans OR lentils OR peas OR peanut\* OR salad OR potato OR potatoes OR burger OR candy OR candies OR confectionar\* OR chips OR snack OR snacks OR sweet OR sweets OR desert OR “ice cream” OR biscuit\* OR cookie\* OR chocolate\* OR pizza OR chips OR grain OR grains OR pasta OR cereal OR cereals OR corn OR maize OR rice OR wheat OR barley OR sorghum OR oat OR oats OR oatmeal OR rye OR cassava OR soybean OR yam OR plantain OR millet OR taro OR milk OR “low fat dairy” OR “low-fat dairy” OR “lowfat dairy” OR butter OR cheese OR cheeses OR margarine OR lard OR yogurt OR “soybean oil” OR “rapeseed oil” OR

“sunflower oil” OR “olive oil” OR “sesame oil” OR “palm oil” OR “coconut oil” OR “cooking oil” OR “vegetable oil” OR “soya oil” OR “peanut oil” OR “groundnut oil” OR fish OR fishes OR seafood OR pollock OR anchovy OR tuna OR sardine OR mackerel OR herring OR cod OR scad OR hairtail OR whiting OR squid OR threadfin OR menhaden OR sprat OR crab OR shrimp OR pilchard OR meat OR meats OR “lean protein” OR beef OR poultry OR chicken OR pork OR mutton OR goat OR egg OR eggs OR fats OR “saturated fat” OR “unsaturated fat” OR polyunsat\* OR poly-unsat\* OR monounsat\* OR mono-unsat\* OR transfat OR trans-fat\* OR sodium OR salt OR sugar OR sugars OR sucrose OR isoglucose OR fiber OR fibre OR “infant formula” OR “baby food” OR “baby foods” OR “infant food” OR “infant foods” OR “toddler formula” OR “toddler milks”)

NOT

(TI(drug OR drugs) OR AB(drug OR drugs))

LIMIT TO: Academic Journals

Search results with the terms and limitations above on 7/3/19:

Business Source Complete: n=3,816  
CINAHL: 842  
EconLit: n=2,830  
Proquest Dissertations & Theses: n=8,404  
PSYCIInfo: n=1,107

Search results with the terms and limitations above on 1/31/20:

Business Source Complete: n=133  
CINAHL: 172  
EconLit: n=153  
Proquest Dissertations & Theses: n=121  
PSYCIInfo: n=60

Search results with the terms and limitations above on 6/1/20:

Business Source Complete: n=57  
CINAHL: 49  
EconLit: n=13  
Proquest Dissertations & Theses: n=20  
PSYCIInfo: n=7

## **Cochrane Search Terms**

### **Concept #1: TREATMENT OR INTERVENTION**

((tax OR taxes OR taxation OR taxed OR taxing OR subsidy OR subsidies OR subsidized OR coupon OR coupons OR incentive OR incentives OR disincentive OR disincentives OR discount OR discounts OR discounted OR pricing OR priced OR “price promotion” OR “price promotions” OR “price floor” OR “price ceiling” OR “price cap” OR “price caps” OR “pricing policy” OR “pricing policies” OR “fiscal policy” OR “fiscal policies” OR “price reduction” OR “price increase” OR voucher OR vouchers OR rebate OR rebates OR levy OR “price response”)):ti,ab,kw

AND

## **Concept #2: TARGETS FOR TREATMENT OR INTERVENTION**

((“sugary drink” OR “sugary drinks” OR “sugary beverages” OR “sweetened beverage” OR “sweetened beverages” OR “sweetened drink” OR “sweetened drinks” OR “sugar-sweetened beverage” OR “sugar-sweetened beverages” OR “sugar-sweetened drink” OR “sugar-sweetened drinks” OR “carbonated beverage” OR “carbonated beverages” OR “carbonated-beverage” OR “carbonated-beverages” OR “carbonated drink” OR “carbonated drinks” OR “carbonated-drink” OR “carbonated-drinks” OR “high-calorie drink” OR “high-calorie drinks” OR “high calorie drink” OR “high calorie drinks” OR “high-calorie beverage” OR “high-calorie beverages” OR “high calorie beverage” OR “high calorie beverages” OR “low-calorie drink” OR “low-calorie drinks” OR “low calorie drink” OR “low calorie drinks” OR “low-calorie beverage” OR “low-calorie beverages” OR “low calorie beverage” OR “low calorie beverages” OR “soft drink” OR “soft drinks” OR “soft-drink” OR “soft-drinks” OR “fizzy drink” OR “fizzy drinks” OR “fizzy-drink” OR “fizzy-drinks” OR “energy drink” OR “energy drinks” OR “energy-drink” OR “energy-drinks” OR “fruit drink” OR “fruit drinks” OR “fruit-drink” OR “fruit-drinks” OR “sports drink” OR “sports drinks” OR “sports-drink” OR “sports-drinks” OR tea OR teas OR coffee OR coffees OR soda OR sodas OR cola OR colas OR “flavored water” OR “vitamin water” OR SSB OR SSBs OR “soda pop” OR “chocolate milk” OR “flavored milk” OR juice OR syrup OR syrups OR “healthy food” OR “healthy foods” OR “unhealthy food” OR “unhealthy foods” OR “nutritious foods” OR “junk food” OR “junk foods” OR “energy dense food” OR “high-calorie food” OR “highcalorie food” OR “high calorie food” OR “energy dense foods” OR “high-calorie foods” OR “highcalorie foods” OR “high calorie foods” OR “low-calorie food” OR “lowcalorie food” OR “low calorie food” OR “low-calorie foods” OR “lowcalorie foods” OR “low calorie foods” OR “highenergy food” OR “high energy food” OR “high-energy food” OR “highenergy foods” OR “high energy foods” OR “lowenergy food” OR “low energy food” OR “low-energy food” OR “lowenergy foods” OR “low energy foods” OR “low-energy foods” OR “low-fat” OR “low fat” OR “lowfat” OR “fatty food” OR “fatty foods” OR “fattening food” OR “fattening-food” OR “salty food” OR “salty-food” OR “processed food” OR “fattening foods” OR “fattening-foods” OR “salty foods” OR “salty-foods” OR “processed foods” OR “takeout food” OR “take-out food” OR “takeaway food” OR “take-away food” OR “takeout foods” OR “take-out foods” OR “takeaway foods” OR “take-away foods” OR “fast food” OR “fast-food” OR “fast foods” OR “fast-foods” OR fastfood OR fruit OR fruits OR vegetable OR vegetables OR legumes OR pulses OR beans OR lentils OR peas OR peanut OR peanuts OR salad OR potato OR potatoes OR burger OR candy OR candies OR confectionary OR confectionaries OR chips OR snack OR snacks OR sweet OR sweets



OR desert OR "ice cream" OR biscuit OR biscuits OR cookie OR cookies OR chocolate OR chocolates OR pizza OR chips OR grain OR grains OR pasta OR cereal OR cereals OR corn OR maize OR rice OR wheat OR barley OR sorghum OR oat OR oats OR oatmeal OR rye OR cassava OR soybean OR yam OR plantain OR millet OR taro OR milk OR "low fat dairy" OR "low-fat dairy" OR "lowfat dairy" OR butter OR cheese OR cheeses OR margarine OR lard OR yogurt OR "soybean oil" OR "rapeseed oil" OR "sunflower oil" OR "olive oil" OR "sesame oil" OR "palm oil" OR "coconut oil" OR "cooking oil" OR "vegetable oil" OR "soya oil" OR "peanut oil" OR "groundnut oil" OR fish OR fishes OR seafood OR pollock OR anchovy OR tuna OR sardine OR mackerel OR herring OR cod OR scad OR hairtail OR whiting OR squid OR threadfin OR menhaden OR sprat OR crab OR shrimp OR pilchard OR meat OR meats OR "lean protein" OR beef OR poultry OR chicken OR pork OR mutton OR goat OR egg OR eggs OR fats OR "saturated fat" OR "unsaturated fat" OR polyunsaturated OR poly-unsaturated OR monounsaturated OR mono-unsaturated OR transfat OR trans-fats OR sodium OR salt OR sugar OR sugars OR sucrose OR isoglucose OR fiber OR fibre OR "infant formula" OR "baby food" OR "baby foods" OR "infant food" OR "infant foods" OR "toddler formula" OR "toddler milks")):ti,ab,kw

NOT (drug OR drugs):ti,ab,kw

Search results in Cochrane CENTRAL with the terms above on 7/3/19: n=335

Search results in Cochrane CENTRAL with the terms above on 1/31/20: n=41

Search results in Cochrane CENTRAL with the terms above on 6/1/20: n=24

Search results in Cochrane CDSR with the terms above on 7/3/19: n=6

Search results in Cochrane CDSR with the terms above on 1/31/20: n=1

Search results in Cochrane CDSR with the terms above on 6/1/20: n=1

## SCOPUS Search Terms

### Concept #1: TREATMENT OR INTERVENTION

TITLE-ABS ( tax OR taxes OR taxation OR taxed OR taxing OR subsidy OR subsidies OR subsidized OR coupon OR coupons OR incentive OR incentives OR disincentive OR disincentives OR discount OR discounts OR discounted OR pricing OR priced OR "fiscal policy" OR "fiscal policies" OR voucher OR vouchers OR rebate OR rebates OR levy OR "price reduction" OR "price increase" OR "price promotion" OR "price promotions" OR "price floor" OR "price ceiling" OR "price cap" OR "price caps" )

AND

### Concept #2: TARGETS FOR TREATMENT OR INTERVENTION

TITLE-ABS ( "sugary drink" OR "sugary drinks" OR "sugary beverages" OR "sweetened beverage" OR "sweetened beverages" OR "sweetened drink" OR "sweetened drinks" OR "sugar-sweetened beverage" OR "sugar-sweetened beverages" OR "sugar-sweetened drink"

OR "sugar-sweetened drinks" OR "carbonated beverage" OR "carbonated beverages" OR "carbonated-beverage" OR "carbonated-beverages" OR "carbonated drink" OR "carbonated drinks" OR "carbonated-drink" OR "carbonated-drinks" OR "high-calorie drink" OR "high-calorie drinks" OR "high calorie drink" OR "high calorie drinks" OR "high-calorie beverage" OR "high-calorie beverages" OR "high calorie beverage" OR "high calorie beverages" OR "low-calorie drink" OR "low-calorie drinks" OR "low calorie drink" OR "low calorie drinks" OR "low-calorie beverage" OR "low-calorie beverages" OR "low calorie beverage" OR "low calorie beverages" OR "soft drink" OR "soft drinks" OR "soft-drink" OR "soft-drinks" OR "fizzy drink" OR "fizzy drinks" OR "fizzy-drink" OR "fizzy-drinks" OR "energy drink" OR "energy drinks" OR "energy-drink" OR "energy-drinks" OR "fruit drink" OR "fruit drinks" OR "fruit-drink" OR "fruit-drinks" OR "sports drink" OR "sports drinks" OR "sports-drink" OR "sports-drinks" OR tea OR teas OR coffee OR coffees OR soda OR sodas OR cola OR colas OR "flavored water" OR "vitamin water" OR ssb\* OR "soda pop" OR "chocolate milk" OR "flavored milk" OR juice OR syrup\* OR "healthy food" OR "healthy foods" OR "unhealthy food" OR "unhealthy foods" OR "nutritious foods" OR "junk food" OR "junk foods" OR "energy dense food" OR "high-calorie food" OR "highcalorie food" OR "high calorie food" OR "energy dense foods" OR "high-calorie foods" OR "highcalorie foods" OR "high calorie foods" OR "low-calorie food" OR "lowcalorie food" OR "low calorie food" OR "low-calorie foods" OR "lowcalorie foods" OR "low calorie foods" OR "highenergy food" OR "high energy food" OR "high-energy food" OR "highenergy foods" OR "high energy foods" OR "high-energy foods" OR "lowenergy food" OR "low energy food" OR "low-energy food" OR "lowenergy foods" OR "low energy foods" OR "low-energy foods" OR "low-fat" OR "low fat" OR "lowfat" OR "fatty food" OR "fatty foods" OR "fattening food" OR "fattening-food" OR "salty food" OR "salty-food" OR "processed food" OR "fattening foods" OR "fattening-foods" OR "salty foods" OR "salty-foods" OR "processed foods" OR "takeout food" OR "take-out food" OR "takeaway food" OR "take-away food" OR "takeout foods" OR "take-out foods" OR "takeaway foods" OR "take-away foods" OR "fast food" OR "fast-food" OR "fast foods" OR "fast-foods" OR fastfood OR fruit OR fruits OR vegetable OR vegetables OR legumes OR pulses OR beans OR lentils OR peas OR peanut\* OR salad OR potato OR potatoes OR burger OR candy OR candies OR confectionar\* OR chips OR snack OR snacks OR sweet OR sweets OR desert OR "ice cream" OR biscuit\* OR cookie\* OR chocolate\* OR pizza OR chips OR grain OR grains OR pasta OR cereal OR cereals OR corn OR maize OR rice OR wheat OR barley OR sorghum OR oat OR oats OR oatmeal OR rye OR cassava OR soybean OR yam OR plantain OR millet OR taro OR milk OR "low fat dairy" OR "low-fat dairy" OR "lowfat dairy" OR butter OR cheese OR cheeses OR margarine OR lard OR yogurt OR "soybean oil" OR "rapeseed oil" OR "sunflower oil" OR "olive oil" OR "sesame oil" OR "palm oil" OR "coconut oil" OR "cooking oil" OR "vegetable oil" OR "soya oil" OR "peanut oil" OR "groundnut oil" OR fish OR fishes OR seafood OR pollock OR anchovy OR tuna OR sardine OR mackerel OR herring OR cod OR scad OR hairtail OR whiting OR squid OR threadfin OR menhaden OR sprat OR crab OR shrimp OR pilchard OR meat OR meats OR "lean protein" OR beef OR poultry OR chicken OR pork OR mutton OR goat OR egg OR eggs OR fats OR "saturated fat" OR "unsaturated fat" OR polyunsat\* OR poly-unsat\* OR monounsat\* OR mono-unsat\* OR transfat OR trans-

fat\* OR sodium OR salt OR sugar OR sugars OR sucrose OR isoglucose OR fiber OR fibre  
OR "infant formula" OR "baby food" OR "baby foods" OR "infant food" OR "infant foods"  
OR "toddler formula" OR "toddler milks" )

AND NOT TITLE-ABS ( drug OR drugs )

AND ( LIMIT-TO ( SRCTYPE , "j" ) )

Search results in SCOPUS with the terms above on 7/3/19: n=15,814

Search results in SCOPUS with the terms above on 1/31/20: n=1,542

Search results in SCOPUS with the terms above on 6/1/20: n=651

## Standard Grey Literature Search Terms

### **Concept #1: TREATMENT OR INTERVENTION**

(tax\* OR subsid\* OR coupon\* OR incentive\* OR discount\* OR pricing OR "price promotion" OR "pricing policy" OR "fiscal policy" OR voucher\* OR rebate\* OR levy)

AND

### **Concept #2: TARGETS FOR TREATMENT OR INTERVENTION**

("sugary drinks" OR "sugar-sweetened beverages" OR "sweetened beverages" OR "soft drinks"  
OR soda OR "high-sugar" OR "healthy food" OR "nutritious food" OR "fatty food" OR "high-  
calorie" OR "energy-dense" OR "junk food" OR "unhealthy food" OR "low fat" OR sugar OR  
"processed food" OR "fast food" OR fruit OR vegetables OR grain OR milk OR meat OR snack OR  
"lean protein" OR fats OR "saturated fat" OR "infant formula" OR sodium)

Search results with the terms above on 8/17/19:

WHO's International Clinical Trials Registry Platform: n=9

PDQ-Evidence for Informed Health Policymaking: n=56

HealthEvidence.org: n=35

WHO Global Index Medicus: n=63

WorldWideScience: n=1,318

Search results with the terms above on 1/31/20:

WHO's International Clinical Trials Registry Platform: n=1

PDQ-Evidence for Informed Health Policymaking: n=0

HealthEvidence.org: n=50

WHO Global Index Medicus: n=6

WorldWideScience: n=30

Search results with the terms above on 6/1/20:

WHO's International Clinical Trials Registry Platform: n=0

PDQ-Evidence for Informed Health Policymaking: n=0

HealthEvidence.org: n=17

WHO Global Index Medicus: n=0

WorldWideScience: n=0

Search results with the above terms and limited to the last three years and the top 500 most relevant results:

National Bureau of Economic Research: n=500

New papers added on 1/31 with the same search terms: 548

New papers added on 6/1 with the same search terms: 33

Search results with the above terms and limited to the top 500 most relevant results:

EconPapers: n=500

New papers added on 1/31 with the same search terms: 500

New papers added on 6/1 with the same search terms: 37

Search results with the above terms and limited to the top 100 most relevant results:

Google Scholar: n=100

New papers added on 1/31 with the same search terms: 100

New papers added on 6/1 with the same search terms: 94

Search results with the second concept only on 8/17/19:

Directory of Open Access Journals: n=250

New papers added on 1/31 with the same search terms: 65

New papers added on 6/1 with the same search terms: 20

### **Highly Simplified Grey Literature Search Terms**

"tax\*" OR "subsid\*" OR "coupon\*" OR "incentive\*" OR "discount\*" OR "pricing"

Free-text Search results with the terms above on 8/17/19:

EPPI-Centre Database of Promoting Health Effectiveness Reviews (DoPHER): n=359

EPPI-Centre Trials Register of Promoting Health Interventions (TRoPHI): n=324

Free-text Search results with the terms above on 6/1/20:

EPPI-Centre Database of Promoting Health Effectiveness Reviews (DoPHER): n=25

EPPI-Centre Trials Register of Promoting Health Interventions (TRoPHI): n=2

### **Two Word Grey Literature AND Combo Search Terms**

tax and beverages  
tax and drinks  
tax and food  
incentive and beverages  
incentive and drinks  
incentive and food  
subsidy and beverages  
subsidy and drinks  
subsidy and food  
pricing and beverages  
pricing and drinks  
pricing and food  
"fiscal policy" and beverages  
"fiscal policy" and drinks  
"fiscal policy" and food

Search results with the terms above on 8/17/19:

SSRN eLibrary: n=1,226

New papers added on 1/31 with the same search terms: 54

New papers added on 6/1 with the same search terms: 0

### **Hand-Screened References**

References from systematic reviews identified using the search strategy above:

n=2,109

References from papers meeting the inclusion criteria

n=90

### **Hand-Screened Government Websites**

Reports from the World Health Organization website

n=30

Reports from the United States Department of Agriculture website

n=8

Reports from foreign government websites

n=46

Reports from other government websites

n=3

We used Covidence (<https://app.covidence.org>) and Mendeley (<https://www.mendeley.com>) as the reference management software to manage the review.

## **eAppendix 2.** Computation of Price Elasticity of Demand

In this review, in addition to examining effect size estimates of outcomes for changes in demand (e.g., sales and consumption), we also convert each demand estimate into a common metric measure known as price elasticity of demand. The price elasticity of demand measure is calculated as a percentage change in demand (sales or consumption) over a percentage change in price. To estimate the price elasticity of demand for subsidized food products, percentage change in price was calculated for each subsidy assuming a 100% pass through, so that the price change was equal to the price discount (e.g., a 50% discount or rebate would correspond to a price change of -50%).

**eTable 1.** Quality Assessment of Fiscal Policy Studies

|               | Question                                                                                       | Scoring System (Yes = 1.0, Partial = 0.5, No = 0)                                                                                                                                                                                                     |
|---------------|------------------------------------------------------------------------------------------------|-------------------------------------------------------------------------------------------------------------------------------------------------------------------------------------------------------------------------------------------------------|
| Control group | 1. Does the study compare outcomes in an appropriate control group?                            | Yes = Control group (e.g., not impacted by policy) or counterfactual used.                                                                                                                                                                            |
|               |                                                                                                | No = Uncontrolled study (no control group or counterfactual).                                                                                                                                                                                         |
| Measures      | 2. Does the study measure outcomes objectively?                                                | Yes = Objective measures: sales (scanner data), purchases (receipts of purchases), prices (scanner data), measured body weight/height, health measurements (e.g., blood pressure), 24-hour dietary intake recall, government/ administrative records. |
|               |                                                                                                | Partial = Data recorded by raters or households, e.g., households recording purchases without receipts.<br>No = Participant self-reported data: self-reported BMI, food frequency surveys, other surveys with self-reported data.                     |
| Follow Up     | 3. Does the study assess outcomes in the same people/stores before and after the intervention? | Yes = Longitudinal design: same people/households/stores at baseline and follow-up.                                                                                                                                                                   |
|               |                                                                                                | No = Not the same people/households/stores, e.g., repeated cross-sections or longitudinal data with high attrition rates (>25%).                                                                                                                      |
| Duration      | 4. How many data points does the study examine before and after the intervention?              | Yes = The study has $\geq 3$ data points before and after the intervention.                                                                                                                                                                           |
|               |                                                                                                | Partial = The study meets the above criteria for either a pre- or post-intervention, but not both.                                                                                                                                                    |
|               |                                                                                                | No = The study has 1-2 observations per pre- and post-assessment.                                                                                                                                                                                     |
| Sample        | 5. Does the study use a representative sample of the population affected by the policy?        | Yes = Representative data of the affected population, e.g., random population sampling.                                                                                                                                                               |
|               |                                                                                                | Partial = Somewhat representative of the affected population, includes scanner household consumer panels.                                                                                                                                             |
|               |                                                                                                | No = Not fully representative or convenience sample, e.g., limited to only one store type or one chain, select list of products or brands or group of customers.                                                                                      |
| Sample        | 6. Does the study have a sufficient sample size?                                               | Yes = Sample size or power analyses provided and shows sufficient sample size.                                                                                                                                                                        |
|               |                                                                                                | No = No information provided or individual sample sizes appear insufficient; e.g., $n < 500$ individuals per site/time period or store audits $n < 50$ per site/time period.                                                                          |

|                                                                                                                                                                                                         |                                                             |                                                                                                                                                                                                                                                         |
|---------------------------------------------------------------------------------------------------------------------------------------------------------------------------------------------------------|-------------------------------------------------------------|---------------------------------------------------------------------------------------------------------------------------------------------------------------------------------------------------------------------------------------------------------|
| Confounding                                                                                                                                                                                             | 7. Does the study adjust adequately for likely confounders? | Yes = If an ITS then it adjusted/removed the effect of existing time trends, seasonality, and economic fluctuations. If different people are in comparison groups, then also adjusts for demographic differences, such as age and socioeconomic status. |
|                                                                                                                                                                                                         |                                                             | Partial = Some of these factors were adjusted for.                                                                                                                                                                                                      |
|                                                                                                                                                                                                         |                                                             | No = None of these factors were adjusted for.                                                                                                                                                                                                           |
| <p><b>Total Score:</b> Sum scores on all measures (range 0 to 7)</p> <p>Low quality score <math>\leq 3.0</math></p> <p>Medium quality score 3.5-4.5</p> <p>High quality score <math>\geq 5.0</math></p> |                                                             |                                                                                                                                                                                                                                                         |



**eTable 2.** Characteristics of Studies

| Source                                    | Location     | Tax type (taxed products)                                  | Subsidy type, (products)                     | Outcome(s)                                        | Study design                               | Source/Type of data        | Population <sup>a</sup>                  | Study quality | Peer-reviewed <sup>b</sup> |
|-------------------------------------------|--------------|------------------------------------------------------------|----------------------------------------------|---------------------------------------------------|--------------------------------------------|----------------------------|------------------------------------------|---------------|----------------------------|
| Aguilar et al, <sup>24</sup> 2019         | Mexico       | 8% ad valorem excise tax (nonessential energy-dense foods) |                                              | Price changes, sales/direct, sales/substitution   | ITS with counterfactual                    | Scanner: Kantar Worldpanel | All                                      | High          | No <sup>b</sup>            |
| Aguilera Aburto et al, <sup>25</sup> 2017 | Mexico       | 8% ad valorem excise tax (nonessential energy-dense foods) |                                              | Price changes                                     | Uncontrolled ITS                           | Survey: INEGI              | All                                      | High          | Yes                        |
| An and Sturm, <sup>26</sup> 2017          | South Africa |                                                            | 10% and 25% cash-back rebate (healthy foods) | Consumption/direct, consumption/substitution      | Cross-sectional with instrumental variable | Primary: survey            | Members of private health insurance plan | Low           | Yes                        |
| An et al, <sup>27</sup> 2013              | South Africa |                                                            | 10% and 25% cash-back rebate                 | Consumption/direct, consumption/substitution, BMI | Cross-sectional with random                | Primary: survey            | Members of private health insurance plan | Low           | Yes                        |

|                                            |        |                                                            |                                               |                                                                            |                               |                                 |                      |      |     |
|--------------------------------------------|--------|------------------------------------------------------------|-----------------------------------------------|----------------------------------------------------------------------------|-------------------------------|---------------------------------|----------------------|------|-----|
|                                            |        |                                                            | (healthy foods)                               |                                                                            | and fixed effects             |                                 |                      |      |     |
| Andreyeva and Luedicke, <sup>28</sup> 2015 | US     |                                                            | \$6-10/month vouchers (fruits and vegetables) | Sales/direct                                                               | Uncontrolled ITS              | Scanner: one grocery chain      | FA recipients (WIC)  | High | Yes |
| Anliker et al, <sup>29</sup> 1992          | US     |                                                            | Cash-value voucher (fruits and vegetables)    | Consumption/direct                                                         | Uncontrolled before and after | Primary: survey                 | FA recipients (WIC)  | Low  | Yes |
| Atoloye, <sup>30</sup> 2019                | US     |                                                            | 50% discount (fruits and vegetables)          | Consumption/direct                                                         | Uncontrolled before and after | Primary: survey                 | FA recipients (SNAP) | Low  | No  |
| Bartlett et al, <sup>31</sup> 2014         | US     |                                                            | 30% discount (fruits and vegetables)          | Consumption/direct, consumption/substitution, dietary intake, sales/direct | Randomized trial              | Primary                         | FA recipients (SNAP) | High | No  |
| Batis et al, <sup>32</sup> 2016            | Mexico | 8% ad valorem excise tax (nonessential energy-dense foods) |                                               | Sales/direct, sales/substitution                                           | ITS with counterfactual       | Scanner: Nielsen Consumer Panel | All                  | High | Yes |

|                                 |           |                                                            |                                                         |                                          |                               |                                   |                                   |      |     |
|---------------------------------|-----------|------------------------------------------------------------|---------------------------------------------------------|------------------------------------------|-------------------------------|-----------------------------------|-----------------------------------|------|-----|
| Bíró, <sup>33</sup> 2015        | Hungary   | Volume-based excise tax (unhealthy and nonessential foods) |                                                         | Sales/direct, sales/substitution         | Controlled before and after   | Scanner: Hungarian consumer panel | All                               | High | Yes |
| Black et al, <sup>34</sup> 2013 | Australia |                                                            | Discounted allotment/weekly box (fruits and vegetables) | Consumption/direct, dietary intake, NCDs | Uncontrolled before and after | Primary: survey                   | Disadvantaged Aboriginal children | Low  | Yes |
| Black et al, <sup>35</sup> 2013 | Australia |                                                            | Discounted allotment/weekly box (fruits and vegetables) | BMI, undernutrition                      | Uncontrolled before and after | Primary: survey                   | Disadvantaged Aboriginal children | Low  | Yes |
| Black et al, <sup>36</sup> 2014 | Australia |                                                            | Discounted allotment/weekly box (fruits and vegetables) | NCDs                                     | Uncontrolled before and after | Primary: survey                   | Disadvantaged Aboriginal children | Low  | Yes |

|                                          |         |                                                            |                                                         |                                                  |                               |                                                                                      |                           |        |     |
|------------------------------------------|---------|------------------------------------------------------------|---------------------------------------------------------|--------------------------------------------------|-------------------------------|--------------------------------------------------------------------------------------|---------------------------|--------|-----|
| Bødker et al, <sup>37</sup> 2015         | Denmark | DKK 16/kg of saturated fat excise tax (saturated fat)      |                                                         | Sales/direct                                     | Uncontrolled before and after | Scanner: Nielsen retail                                                              | All                       | Medium | Yes |
| Bonilla-Chacin et al, <sup>38</sup> 2016 | Mexico  | 8% ad valorem excise tax (nonessential energy-dense foods) |                                                         | Price changes                                    | Uncontrolled before and after | Survey: INEGI                                                                        | All                       | Medium | No  |
|                                          |         |                                                            |                                                         | Sales/direct, sales/substitution                 |                               | Survey: ENIGH                                                                        |                           | Low    |     |
| Bowling et al, <sup>39</sup> 2016        | US      |                                                            | Discount and cash-value voucher (fruits and vegetables) | Consumption/direct, consumption/substitution     | Uncontrolled before and after | Primary: survey                                                                      | FA recipients (SNAP, WIC) | Low    | Yes |
| Chakrabarti et al, <sup>40</sup> 2018    | India   |                                                            | Discount (staple foods/pulses)                          | Consumption/direct, sales/direct, dietary intake | Controlled before and after   | Household surveys: Consumer Expenditure Survey, Village Dynamics in South Asia panel | Low-income populations    | Medium | Yes |

|                                       |         |                                                            |                                               |                             |                               |                                                       |                            |        |     |
|---------------------------------------|---------|------------------------------------------------------------|-----------------------------------------------|-----------------------------|-------------------------------|-------------------------------------------------------|----------------------------|--------|-----|
| Chakrabarti et al, <sup>41</sup> 2019 | India   |                                                            | Discount (staple foods/fortified wheat flour) | Undernutrition              | Controlled before and after   | Household survey: Indian District Level Health survey | Pregnant women, low income | Medium | Yes |
| Colchero et al, <sup>42</sup> 2017    | Mexico  | 8% ad valorem excise tax (nonessential energy-dense foods) |                                               | Price changes               | Uncontrolled before and after | Primary: store audits                                 | All                        | Low    | Yes |
| Durward et al, <sup>43</sup> 2019     | US      |                                                            | 50% discount (fruits and vegetables)          | Consumption/direct          | Uncontrolled before and after | Primary: survey                                       | FA recipients (SNAP)       | Low    | Yes |
| ECSIPC, <sup>44</sup> 2014            | Denmark | DKK 16/kg of saturated fat excise tax (saturated fat)      |                                               | Price changes, sales/direct | Uncontrolled before and after | Database: Euromonitor Passport                        | All                        | Low    | No  |
|                                       | Denmark | Weight-based excise tax (ice cream,                        |                                               |                             |                               |                                                       |                            |        |     |

|                                    |         |                                                           |                                                       |                                  |                                    |                            |                                         |      |     |
|------------------------------------|---------|-----------------------------------------------------------|-------------------------------------------------------|----------------------------------|------------------------------------|----------------------------|-----------------------------------------|------|-----|
|                                    |         | chocolate, sweets)                                        |                                                       |                                  |                                    |                            |                                         |      |     |
|                                    | Finland | Weight-based excise tax (confectionary, ice cream)        |                                                       |                                  |                                    |                            |                                         |      |     |
|                                    | Hungary | Weight-based excise tax (unhealthy and nonessential food) |                                                       |                                  |                                    |                            |                                         |      |     |
| French et al, <sup>45</sup> 2017   | US      |                                                           | 30% discount (fruit and vegetables)                   | Sales/direct, sales/substitution | Randomized trial                   | Primary                    | Low-income adults                       | High | Yes |
| Gordes, <sup>46</sup> 2016         | US      | State sales tax (candy, snacks)                           |                                                       | BMI                              | Cross-sectional with fixed effects | Survey: BRFSS              | Adults                                  | Low  | Yes |
| Griffith et al, <sup>47</sup> 2018 | UK      |                                                           | Cash-value voucher (fresh fruit and vegetables, milk) | Sales/direct                     | Controlled before and after        | Scanner: Kantar Worldpanel | Low-income families with young children | High | Yes |

|                                          |              |                                                            |                                             |                                                                   |                             |                       |                      |        |     |
|------------------------------------------|--------------|------------------------------------------------------------|---------------------------------------------|-------------------------------------------------------------------|-----------------------------|-----------------------|----------------------|--------|-----|
| Grindal et al, <sup>48</sup> 2016        | US           |                                                            | 30% discount (fruits and vegetables )       | Sales/direct                                                      | Randomized trial            | Primary               | FA recipients (SNAP) | High   | Yes |
| Guerrero-Lopez et al, <sup>49</sup> 2017 | Mexico       | 8% ad valorem excise tax (nonessential energy-dense foods) |                                             | UC (unemployment )                                                | Uncontrolled ITS            | Survey: industry EMIM | All                  | High   | Yes |
| Harnack et al, <sup>50</sup> 2016        | US           |                                                            | 30% discount (fruits and vegetables )       | Consumption/direct, consumption/substitution, BMI, dietary intake | Randomized trial            | Primary               | Low-income adults    | High   | Yes |
| Henderson, <sup>51</sup> 2020            | US           |                                                            | 50% discount (fruits and vegetables )       | Price changes, sales/direct                                       | Controlled before and after | Primary: survey       | FA recipients (SNAP) | Medium | No  |
| Herman et al, <sup>52</sup> 2008         | US           |                                                            | Cash-value voucher (fruits and vegetables ) | Consumption/direct                                                | Controlled before and after | Primary: survey       | FA recipients (WIC)  | Low    | Yes |
| Hoy, <sup>53</sup> 2017                  | Colorado, US | State sales tax (candy)                                    |                                             | Sales/direct, sales/substitution                                  | Controlled before and after | Scanner: Nielsen      | All                  | High   | No  |

|                                     |         |                                                       |                                      |                                  |                               |                                          |                                   |      |     |
|-------------------------------------|---------|-------------------------------------------------------|--------------------------------------|----------------------------------|-------------------------------|------------------------------------------|-----------------------------------|------|-----|
|                                     |         |                                                       |                                      |                                  |                               | Consumer Panel                           |                                   |      |     |
| Jensen and Smed, <sup>54</sup> 2013 | Denmark | DKK 16/kg of saturated fat excise tax (saturated fat) |                                      | Price changes, sales/direct      | Uncontrolled ITS              | Scanner: GfK Panel Services Denmark      | All                               | High | Yes |
| Jensen et al, <sup>55</sup> 2016    | Denmark | DKK 16/kg of saturated fat excise tax (saturated fat) |                                      | Price changes, sales/direct      | Uncontrolled before and after | Scanner: Coop Danmark (5 grocery chains) | All                               | High | Yes |
| Klerman et al, <sup>56</sup> 2014   | US      |                                                       | 30% discount (fruits and vegetables) | Consumption/direct               | Randomized trial              | Primary                                  | FA recipients (SNAP)              | High | Yes |
| Lindsay et al, <sup>57</sup> 2013   | US      |                                                       | 50% discount (fruits and vegetables) | Consumption/direct               | Uncontrolled before and after | Primary: survey                          | FA recipients (SNAP, WIC)         | Low  | Yes |
| Moran et al, <sup>58</sup> 2019     | US      |                                                       | 50% discount (fruits and vegetables) | Consumption/direct               | Randomized trial              | Primary                                  | Low-income families with children | Low  | Yes |
|                                     |         |                                                       |                                      | Sales/direct, sales/substitution |                               | Scanner: one                             |                                   | High |     |



|                                       |           |                                                            |                                                 |                                                              |                               |                                 |                         |        |     |
|---------------------------------------|-----------|------------------------------------------------------------|-------------------------------------------------|--------------------------------------------------------------|-------------------------------|---------------------------------|-------------------------|--------|-----|
|                                       |           |                                                            |                                                 |                                                              |                               | grocery chain                   |                         |        |     |
| Moreno Neri et al, <sup>59</sup> 2016 | Mexico    | 8% ad valorem excise tax (nonessential energy-dense foods) |                                                 | Sales/direct, UC (employment)                                | Uncontrolled before and after | Primary: survey                 | Bakeries                | Low    | No  |
| Nipers et al, <sup>60</sup> 2019      | Latvia    |                                                            | Reduced value added tax (fruits and vegetables) | Price changes                                                | Controlled before and after   | Primary: survey                 | All                     | Medium | Yes |
| Oaks, <sup>61</sup> 2005              | Maine, US | State sales tax (snacks)                                   |                                                 | BMI                                                          | Controlled ITS                | Survey: BRFSS                   | Adults                  | Medium | No  |
| Olsho et al, <sup>62</sup> 2015       | US        |                                                            | 40% discount (fruits and vegetables)            | Consumption/direct                                           | Controlled before and after   | Survey: community health survey | New York City residents | Low    | Yes |
| Olsho et al, <sup>63</sup> 2016       | US        |                                                            | 30% discount (fruits and vegetables)            | Consumption/direct, consumption/substitution, dietary intake | Randomized trial              | Primary                         | FA recipients (SNAP)    | High   | Yes |
| Pedraza et al, <sup>64</sup> 2018     | Mexico    | 8% ad valorem excise tax (nonessential)                    |                                                 | Sales/direct, sales/substitution                             | Uncontrolled ITS              | Scanner: Nielsen Consumer Panel | All                     | Medium | Yes |

|                                         |        |                                                            |                                       |                                  |                               |                                 |                                   |      |     |
|-----------------------------------------|--------|------------------------------------------------------------|---------------------------------------|----------------------------------|-------------------------------|---------------------------------|-----------------------------------|------|-----|
|                                         |        | al energy-dense foods)                                     |                                       |                                  |                               |                                 |                                   |      |     |
| Phipps et al, <sup>65</sup> 2015        | US     |                                                            | 50% discount (fruits and vegetables ) | Sales/direct                     | Randomize d trial             | Primary                         | Low-income families with children | High | Yes |
| Polacsek et al, <sup>66</sup> 2018      | US     |                                                            | 50% discount (fruits and vegetables ) | Sales/direct                     | Randomize d trial             | Primary                         | Low-income families with children | High | Yes |
| Rummo et al, <sup>67</sup> 2019         | US     |                                                            | 50% discount (fruits and vegetables ) | Sales/direct, sales/substitution | Controlled before and after   | Scanner: one grocery chain      | FA recipients (SNAP)              | High | Yes |
| Salgado and Ng, <sup>68</sup> 2019      | Mexico | 8% ad valorem excise tax (nonessential energy-dense foods) |                                       | Price changes                    | Uncontrolled before and after | Scanner: Nielsen Consumer Panel | All                               | High | Yes |
| Savoie-Roskos et al, <sup>69</sup> 2016 | US     |                                                            | 50% discount (fruits and vegetables ) | Consumption/direct               | Uncontrolled before and after | Primary: survey                 | Adults                            | Low  | Yes |

|                                                      |              |                                                       |                                                         |                                  |                             |                                           |                                |      |     |
|------------------------------------------------------|--------------|-------------------------------------------------------|---------------------------------------------------------|----------------------------------|-----------------------------|-------------------------------------------|--------------------------------|------|-----|
| Smed et al, <sup>70</sup> 2016                       | Denmark      | DKK 16/kg of saturated fat excise tax (saturated fat) |                                                         | Sales/direct, sales/substitution | Uncontrolled ITS            | Scanner: GfK Panel Services Scandinavia   | All                            | High | Yes |
| Smith, <sup>71</sup> 2017                            | US           |                                                       | \$6-10/month cash-value voucher (fruits and vegetables) | Consumption/direct               | Controlled before and after | Primary: survey                           | FA recipients (WIC)            | Low  | No  |
| Steele-Adjognon and Weatherspoon, <sup>72</sup> 2017 | US           |                                                       | 50% discount (fruits and vegetables)                    | Sales/direct                     | Controlled before and after | Scanner: one grocery chain                | FA recipients (SNAP)           | High | Yes |
| Sturm et al, <sup>73</sup> 2013                      | South Africa |                                                       | 10% and 25% cash-back rebate (healthy foods)            | Sales/direct, sales/substitution | Controlled before and after | Scanner: credit card purchases Pick N Pay | Members of private health plan | High | Yes |
| Taillie et al, <sup>74</sup> 2017                    | Mexico       | 8% ad valorem excise tax (nonessential energy-        |                                                         | Sales/direct, sales/substitution | ITS with counterfactual     | Scanner: Nielsen Consumer Panel           | All                            | High | Yes |

|                                    |    |              |                                                |                                  |                               |                       |                      |        |     |
|------------------------------------|----|--------------|------------------------------------------------|----------------------------------|-------------------------------|-----------------------|----------------------|--------|-----|
|                                    |    | dense foods) |                                                |                                  |                               |                       |                      |        |     |
| Vericker et al, <sup>75</sup> 2019 | US |              | 50% discount (fruits and vegetables )          | Sales/direct, consumption/direct | Controlled before and after   | Primary: survey       | FA recipients (SNAP) | Medium | No  |
| Wilde et al, <sup>76</sup> 2016    | US |              | 30% discount (fruits and vegetables )          | Sales/direct                     | Randomized trial              | Primary               | FA recipients (SNAP) | Medium | Yes |
| Zenk et al, <sup>77</sup> 2014     | US |              | \$6-10/month vouchers (fruits and vegetables ) | Price changes                    | Uncontrolled before and after | Primary: store audits | All                  | Medium | Yes |

*Abbreviations:* INEGI, Mexico's Statistics Institute (*Instituto Nacional de Estadística y Geografía*, Spanish); BMI, body mass index; FA, food assistance; WIC, Special Supplemental Nutrition Assistance Program for Women, Infants, and Children; SNAP, Supplemental Nutrition Assistance Program; CBA, controlled before and after; ITS, interrupted time series; NCD, non-communicable disease; ENIGH, National Income and Expenditure Household Survey (in Spanish); BRFSS, Behavioral Risk Factor Surveillance System; UC, unintended consequences; EMIM, Monthly Survey of Manufacturing Industry.

*Notes:* An ITS design is defined as a study design that uses longitudinal data and has three or more post-treatment periods. An ITS was further classified as a controlled ITS, ITS with a counterfactual, and uncontrolled ITS. A controlled ITS used non-treated sites as a comparison; an ITS with a counterfactual used a counterfactual that was not untreated sites, for example, the pre-treatment trend or untaxed foods; an uncontrolled ITS did not have any type of comparison group. A before and after study used longitudinal data and made comparisons in two time periods: before and after tax implementation. Before and after studies were further classified as

controlled before and after, and uncontrolled before and after. The criteria for these classifications are the same as for the ITS study designs.

<sup>a</sup> Not reporting #s of participants due to differences in the type of participants across studies (e.g., products, households, stores).

<sup>b</sup> Published in peer-reviewed literature since June 1, 2020.

**eTable 3.** Sources of Heterogeneity ( $\tau^2$ ) for 3-Level Random Effects Models

| Outcome                         | Source of $\tau^2$ (95% CI) |                      |
|---------------------------------|-----------------------------|----------------------|
|                                 | Between study               | Within study         |
| Fruit and vegetable consumption | 0.112 (0.000, 0.580)        | 0.001 (0.000, 0.209) |
| Fruit and vegetable sales       | 0.334 (0.000, 0.762)        | 0.034 (0.000, 0.457) |

**eFigure.** Publication Bias: Funnel Test (Left Panel) and Egger's Regression Test Plot (Right) for Sales: Price Elasticity of Demand for Fruit and Vegetables

Egger's test is significant ( $P < .05$ ).

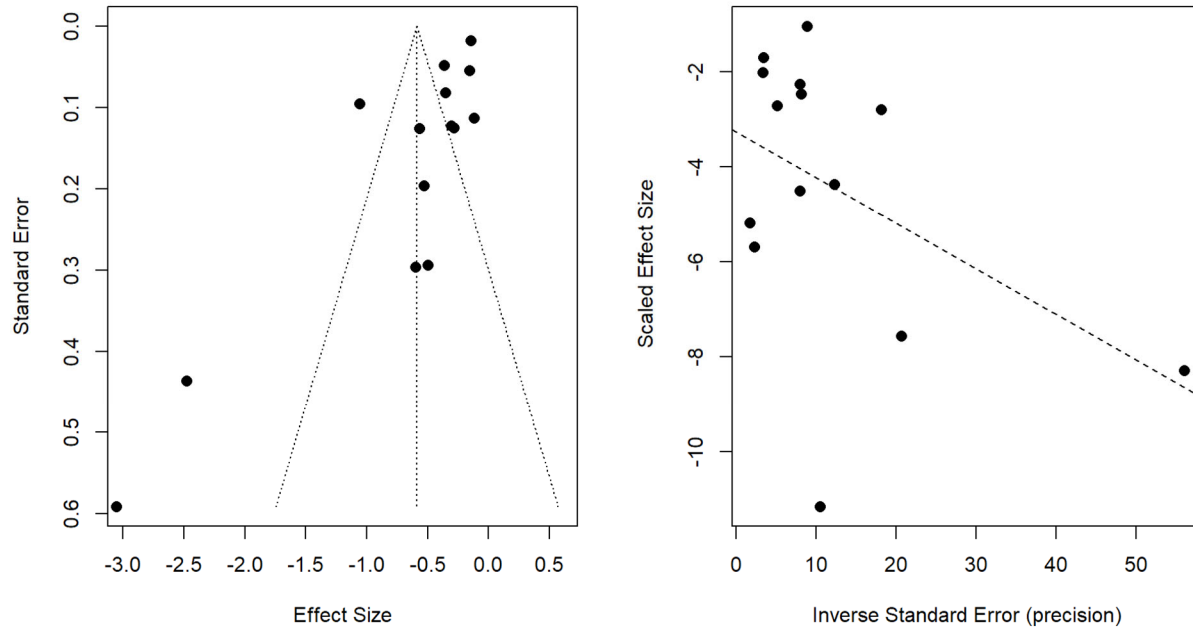

Supplement: jamanetwopen-e2214371-s001.pdf [file jamanetwopen-e2214371-s001.pdf]
